# Supplementary material for: Global DNA Methylation in Cord Blood as a Biomarker for Prenatal Lead and Antimony Exposures
Source: MDPI journal article supplement (doi:10.3390/toxics10040157), 2022-03-26
Supplement: s1 [file s1]

# Supplementary Materials: Global DNA Methylation in Cord Blood as a Biomarker for Prenatal Lead and Antimony Exposures

Yoshinori Okamoto, Miyuki Iwai-Shimada, Kunihiro Nakai, Nozomi Tatsuta, Yoko Mori, Akira Aoki, Nakao Kojima, Tatsuyuki Takada, Hiroshi Satoh and Hideto Jinno

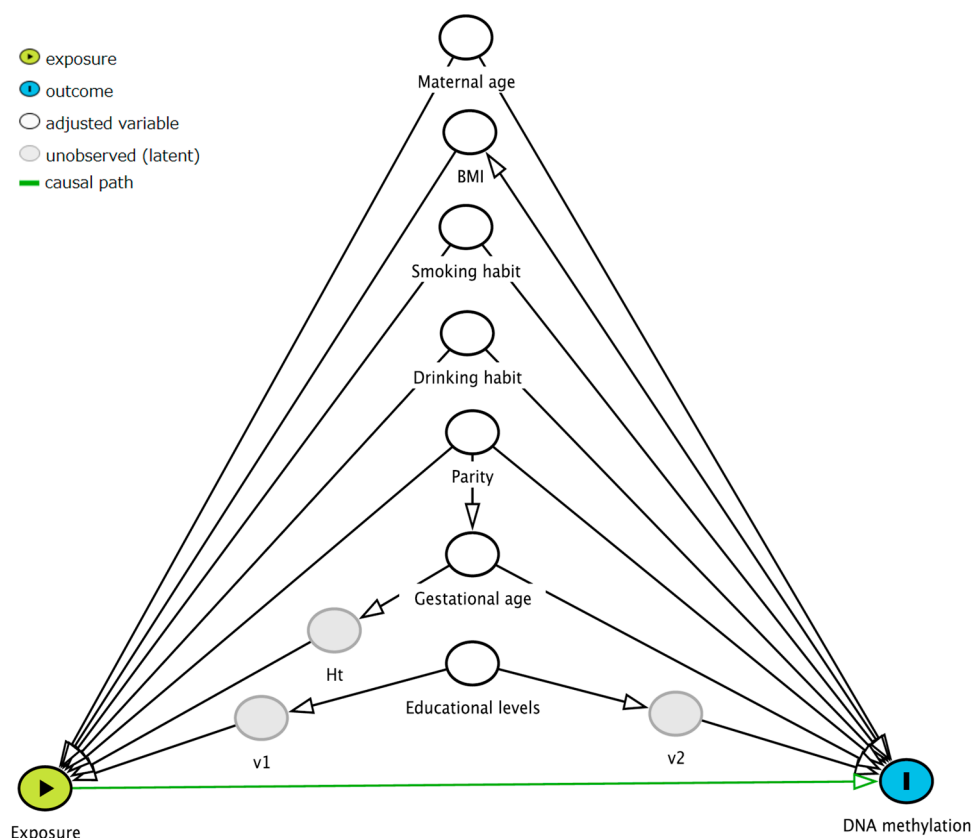

**Figure S1.** Directed acyclic graph showing the hypothesized relationship among prenatal chemical exposure, DNA methylation, and covariates. Ht, Hematocrit value; v1, variable 1; v2, variable 2.
